# Supplementary material
Source: PubMed Central journal article supplement (PMC3421957)
Supplement: neo1407_0612SD1.pdf [file neo1407_0612SD1.pdf]

**Table W1.** Quantification of Relative VEGFR2 Receptor Expression in Cytosolic and Nuclear Fractions in WM115 and WM239 Melanoma Cells Treated with Bevacizumab (50 µg/ml).

|                     | Time (min)          | pVEGFR2 Site | Exogenous VEGF | Relative Expression ± SEM |             |
|---------------------|---------------------|--------------|----------------|---------------------------|-------------|
| <b>A</b>            |                     |              |                |                           |             |
| Cytosolic fractions | 15                  | Y951         | -              | 0.98 ± 0.24               |             |
|                     | 30                  | Y951         | -              | 0.86 ± 0.11               |             |
|                     | 15                  | Y951         | +              | 0.92 ± 0.08               |             |
|                     | 30                  | Y951         | +              | 0.94 ± 0.16               |             |
|                     | 15                  | Y1175        | -              | 1.13 ± 0.24               |             |
|                     | 30                  | Y1175        | -              | 0.87 ± 0.28               |             |
| Nuclear fractions   | 15                  | Y1175        | +              | 1.09 ± 0.18               |             |
|                     | 30                  | Y1175        | +              | 0.88 ± 0.10               |             |
|                     | 15                  | Y951         | -              | 0.81 ± 0.07*              |             |
|                     | 30                  | Y951         | -              | 0.81 ± 0.02*              |             |
|                     | 15                  | Y951         | +              | 0.92 ± 0.22               |             |
|                     | 30                  | Y951         | +              | 1.04 ± 0.06               |             |
| Nuclear fractions   | 15                  | Y1175        | -              | 1.00 ± 0.22               |             |
|                     | 30                  | Y1175        | -              | 0.83 ± 0.11               |             |
|                     | 15                  | Y1175        | +              | 0.80 ± 0.02*              |             |
|                     | 30                  | Y1175        | +              | 1.13 ± 0.047              |             |
|                     | <b>B</b>            |              |                |                           |             |
|                     | Cytosolic fractions | 15           | Y951           | -                         | 0.96 ± 0.08 |
| 30                  |                     | Y951         | -              | 0.88 ± 0.16               |             |
| 15                  |                     | Y951         | +              | 1.22 ± 0.18               |             |
| 30                  |                     | Y951         | +              | 1.49 ± 0.60               |             |
| 15                  |                     | Y1175        | -              | 0.83 ± 0.04*              |             |
| 30                  |                     | Y1175        | -              | 1.00 ± 0.28               |             |
| Nuclear fractions   | 15                  | Y1175        | +              | 1.14 ± 0.15               |             |
|                     | 30                  | Y1175        | +              | 1.29 ± 0.17               |             |
|                     | 15                  | Y951         | -              | 0.97 ± 0.13               |             |
|                     | 30                  | Y951         | -              | 1.00 ± 0.07               |             |
|                     | 15                  | Y951         | +              | 1.05 ± 0.13               |             |
|                     | 30                  | Y951         | +              | 1.27 ± 0.17               |             |
| Nuclear fractions   | 15                  | Y1175        | -              | 0.96 ± 0.08               |             |
|                     | 30                  | Y1175        | -              | 0.89 ± 0.11               |             |
|                     | 15                  | Y1175        | +              | 1.14 ± 0.11               |             |
|                     | 30                  | Y1175        | +              | 1.15 ± 0.13               |             |

The relative expression of native and phosphorylated VEGFR2 receptor (at Y951 and Y1175 sites) was assessed at 15- and 30-minute time points after bevacizumab addition, with or without exogenous VEGF. (A) Addition of bevacizumab had no significant ( $P > .05$ ) effect on the phosphorylation of VEGFR2 receptor (Y951/Y1175) in cytosolic fractions 15 and 30 minutes after addition ( $\pm$ VEGF), whereas it significantly ( $*P < .05$ ) inhibited VEGFR2 phosphorylation at Y951 (both 15 and 30 minutes after addition, -VEGF) and Y1175 (15 minutes after addition, +VEGF) in nuclear fractions in WM115 cells ( $*P < .05$ ). (B) Similarly, addition of bevacizumab to the medium of WM239 cells only had a significant inhibitory effect on the phosphorylation of VEGFR2 at Y1175 in cytosolic fractions after 15 minutes (-VEGF;  $*P < .05$ ). No significant change in phosphorylation of VEGFR2 (Y951/Y1175) was observed in nuclear fractions 15 and 30 minutes after bevacizumab addition ( $\pm$ VEGF;  $P > .05$ ).
